# Supplementary material for: OUP accepted manuscript
Source: Oxford University Press journal article supplement (doi:10.1093/database/baaa080), 2020-01-01
Supplement: baaa080_supp.zip [file baaa080_supp.zip]

**Figures S1 – S9.** Maximum likelihood phylogenetic trees for each specific EukRef database constructed in RAxML using GTRCAT model. Statistical support is derived from 100 bootstrap replicates. Euglenida and Glycomonada datasets were each split into two separate tree figures as they both contain very large number of sequences. Trees are outgroup rooted. Tip labels are the final classification in the databases.

**Figure S1**  
**Preaxostyla**

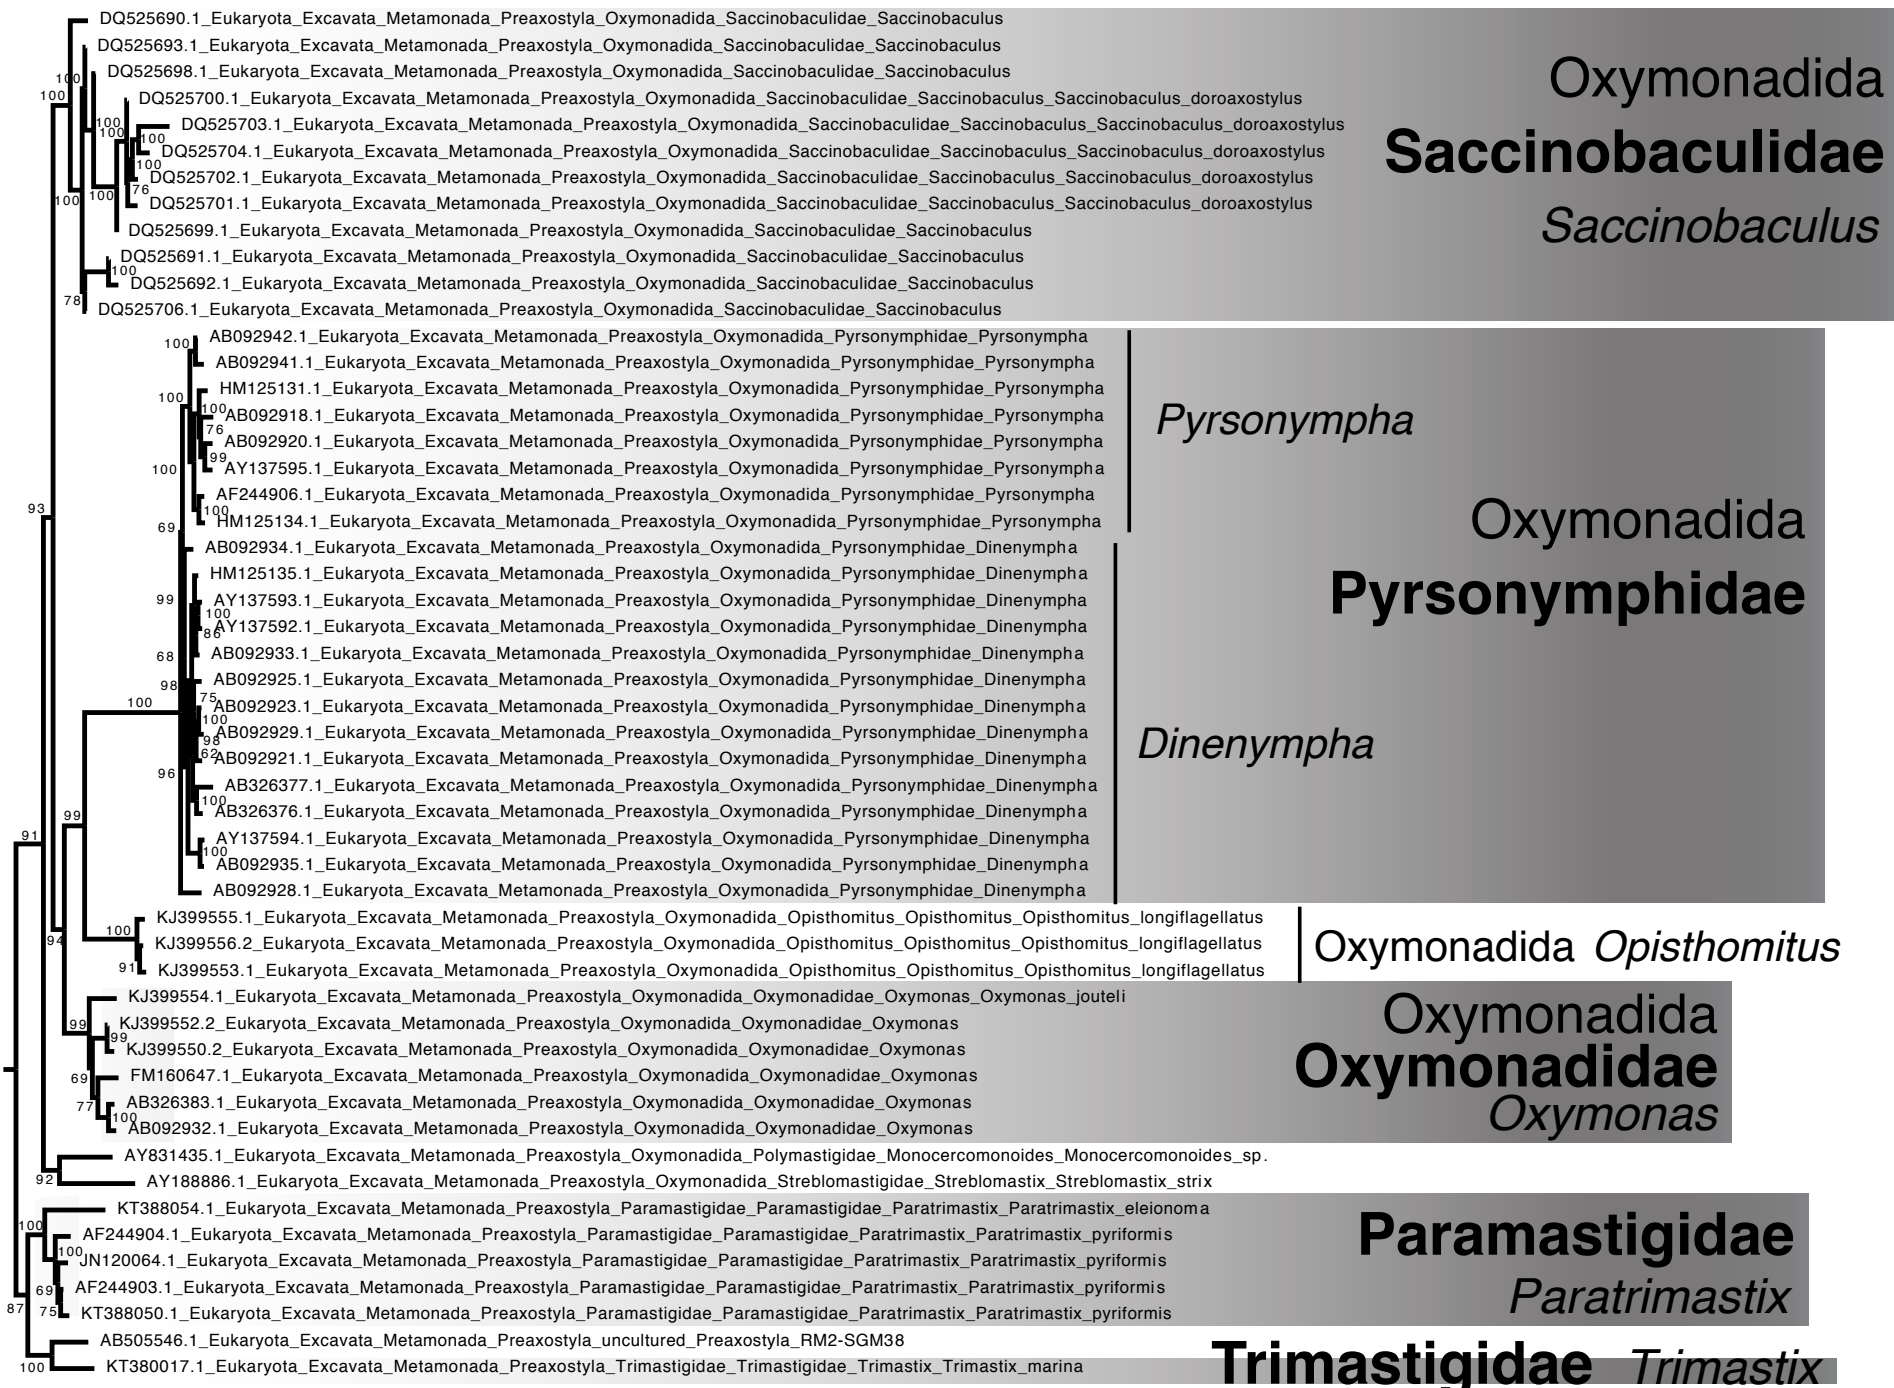

Oxymonadida  
**Saccinobaculidae**  
*Saccinobaculus*

*Pyrsonympha*

Oxymonadida  
**Pyrsonymphidae**

*Dinenympha*

Oxymonadida *Opisthomitus*

Oxymonadida  
**Oxymonadidae**  
*Oxymonas*

**Paramastigidae**  
*Paratrimastix*

**Trimastigidae** *Trimastix*

0.5  
2120 positions

Figure S2  
Fornicata

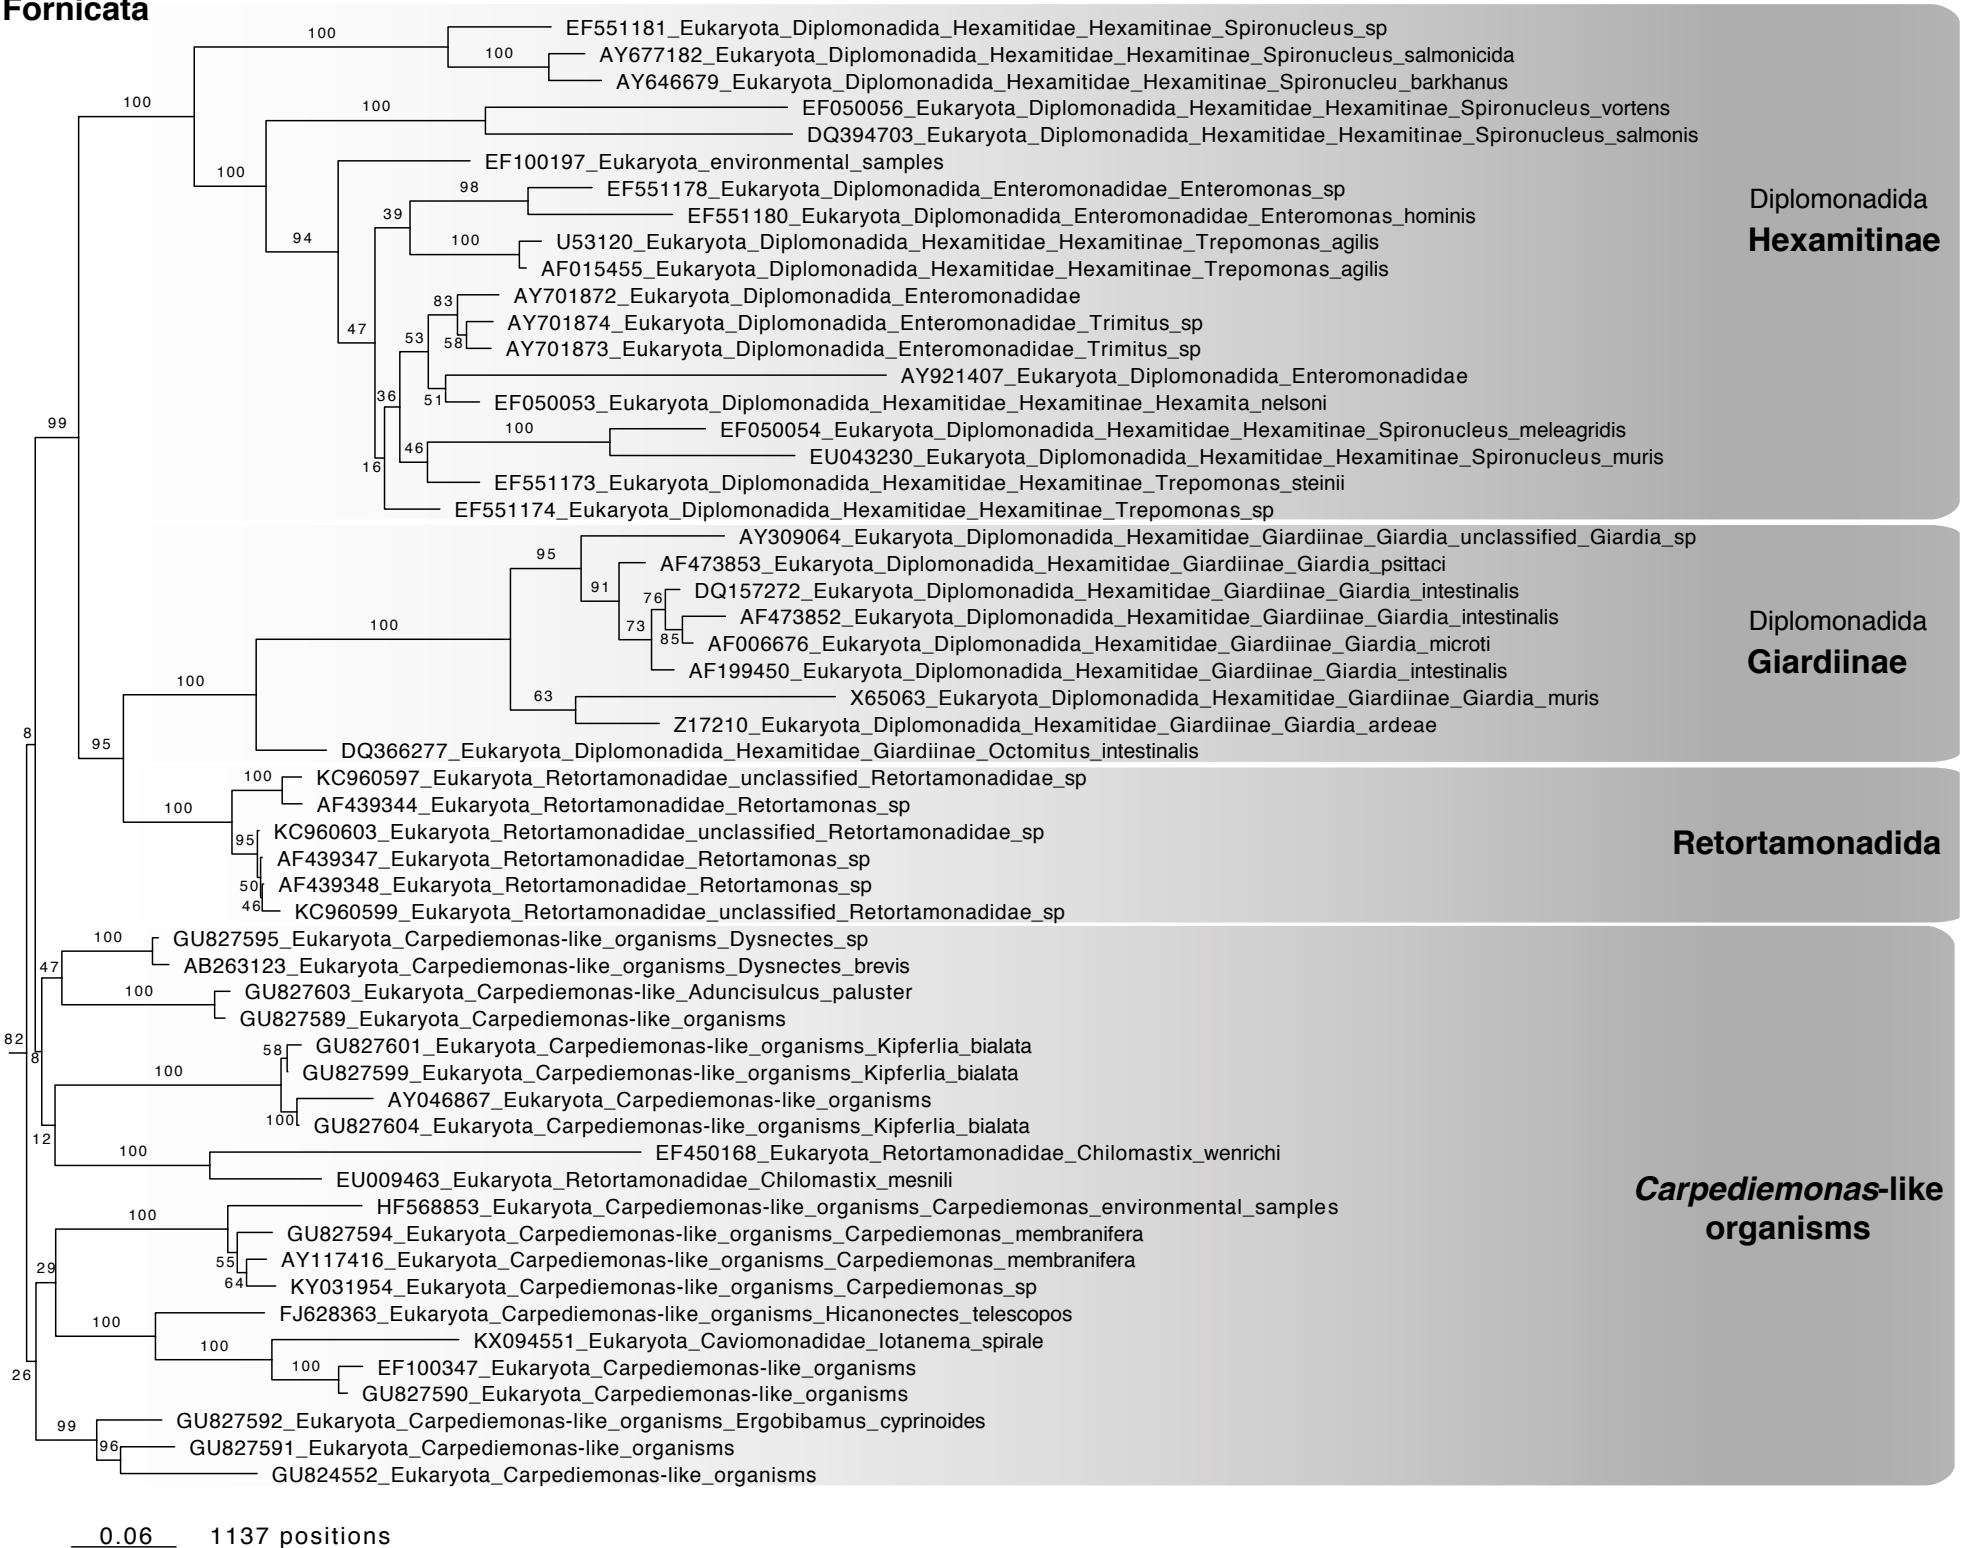

Figure S3  
Parabasalia

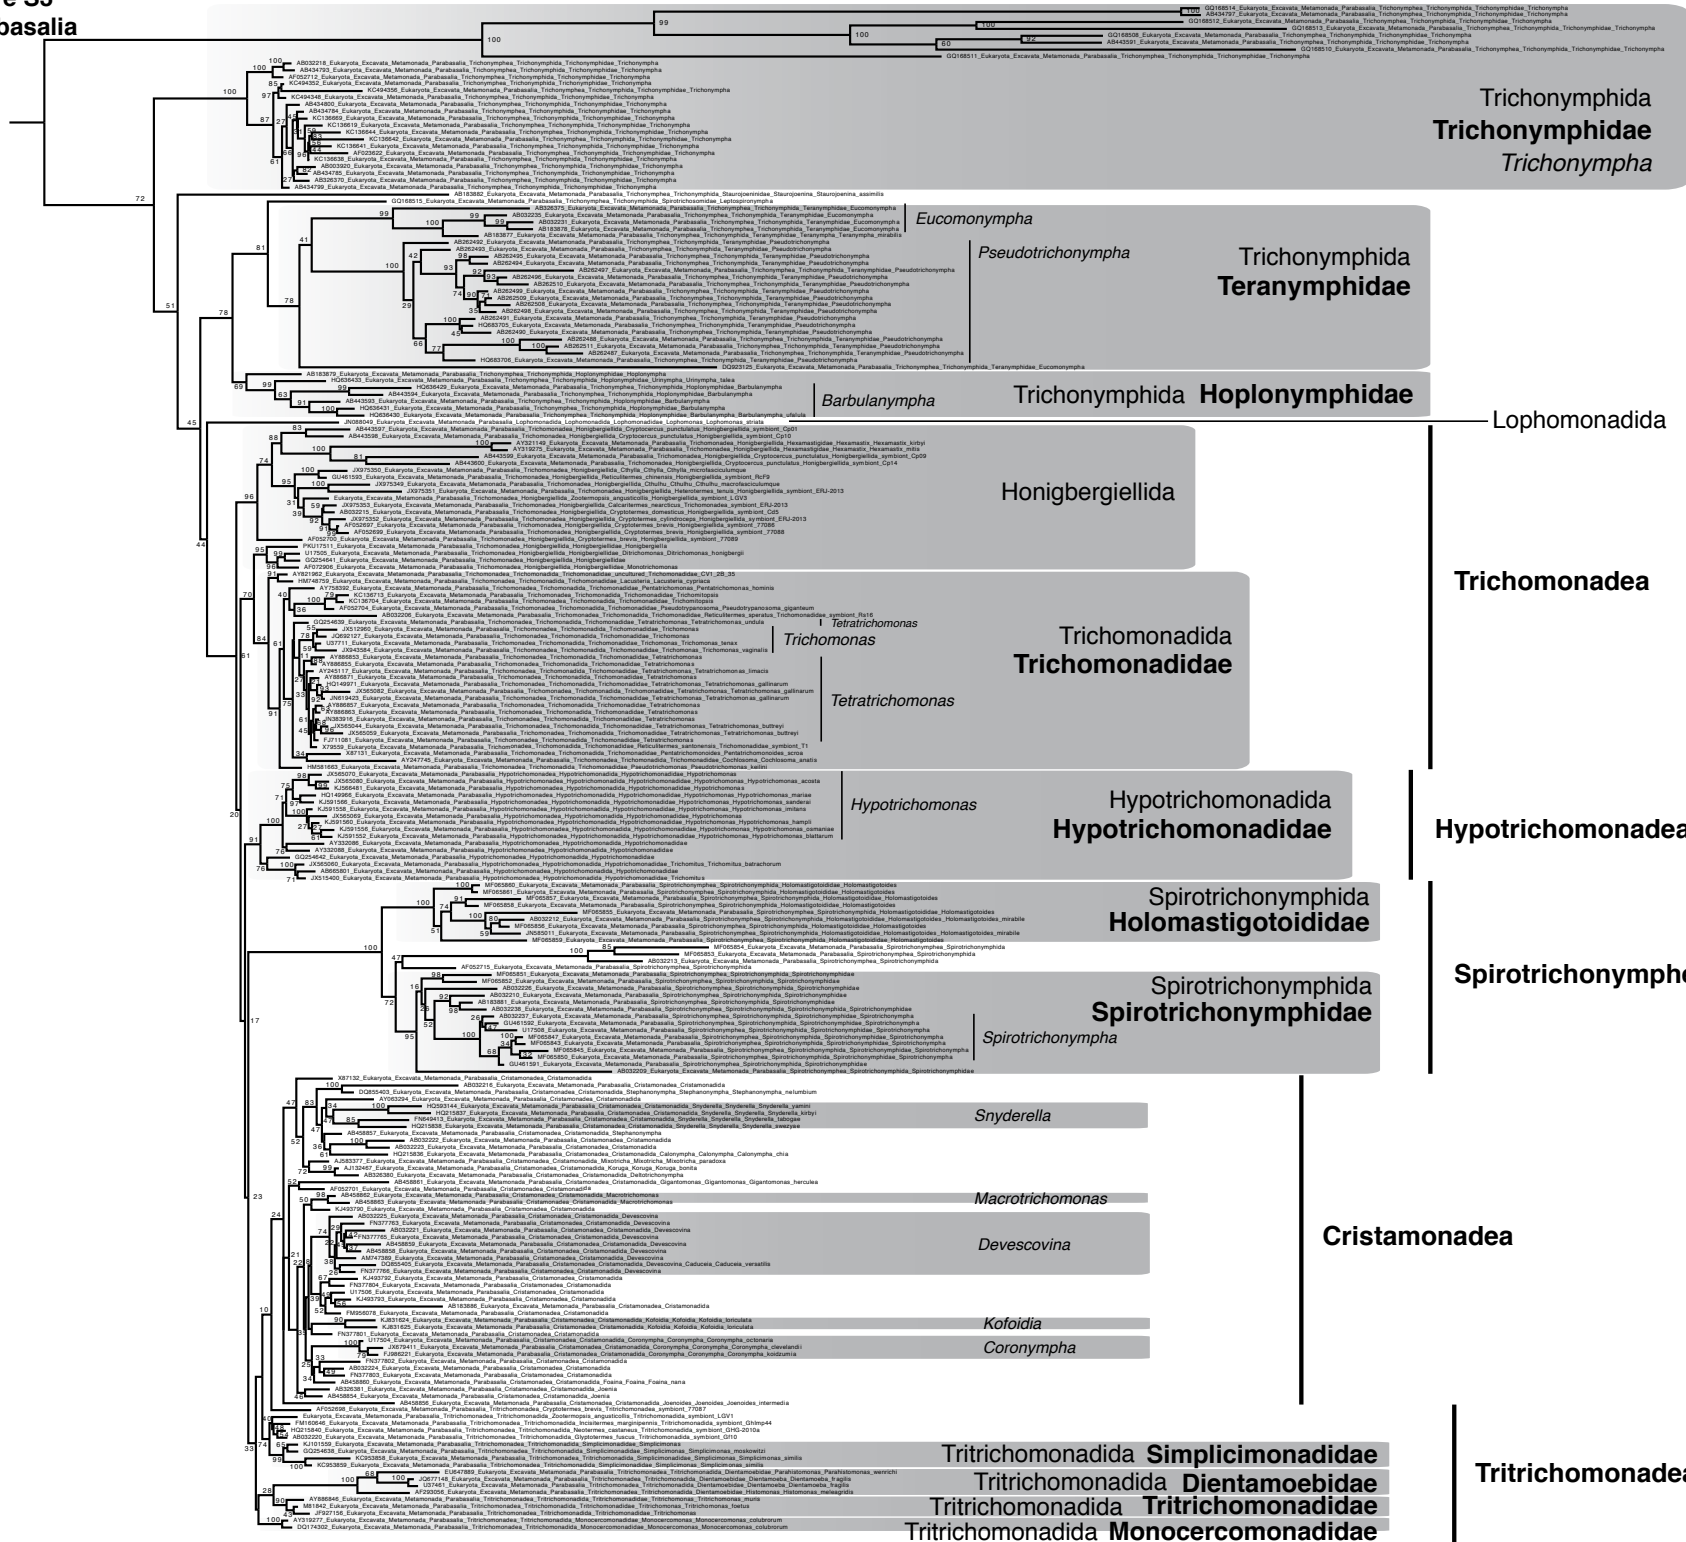

Figure S4  
Jakobida

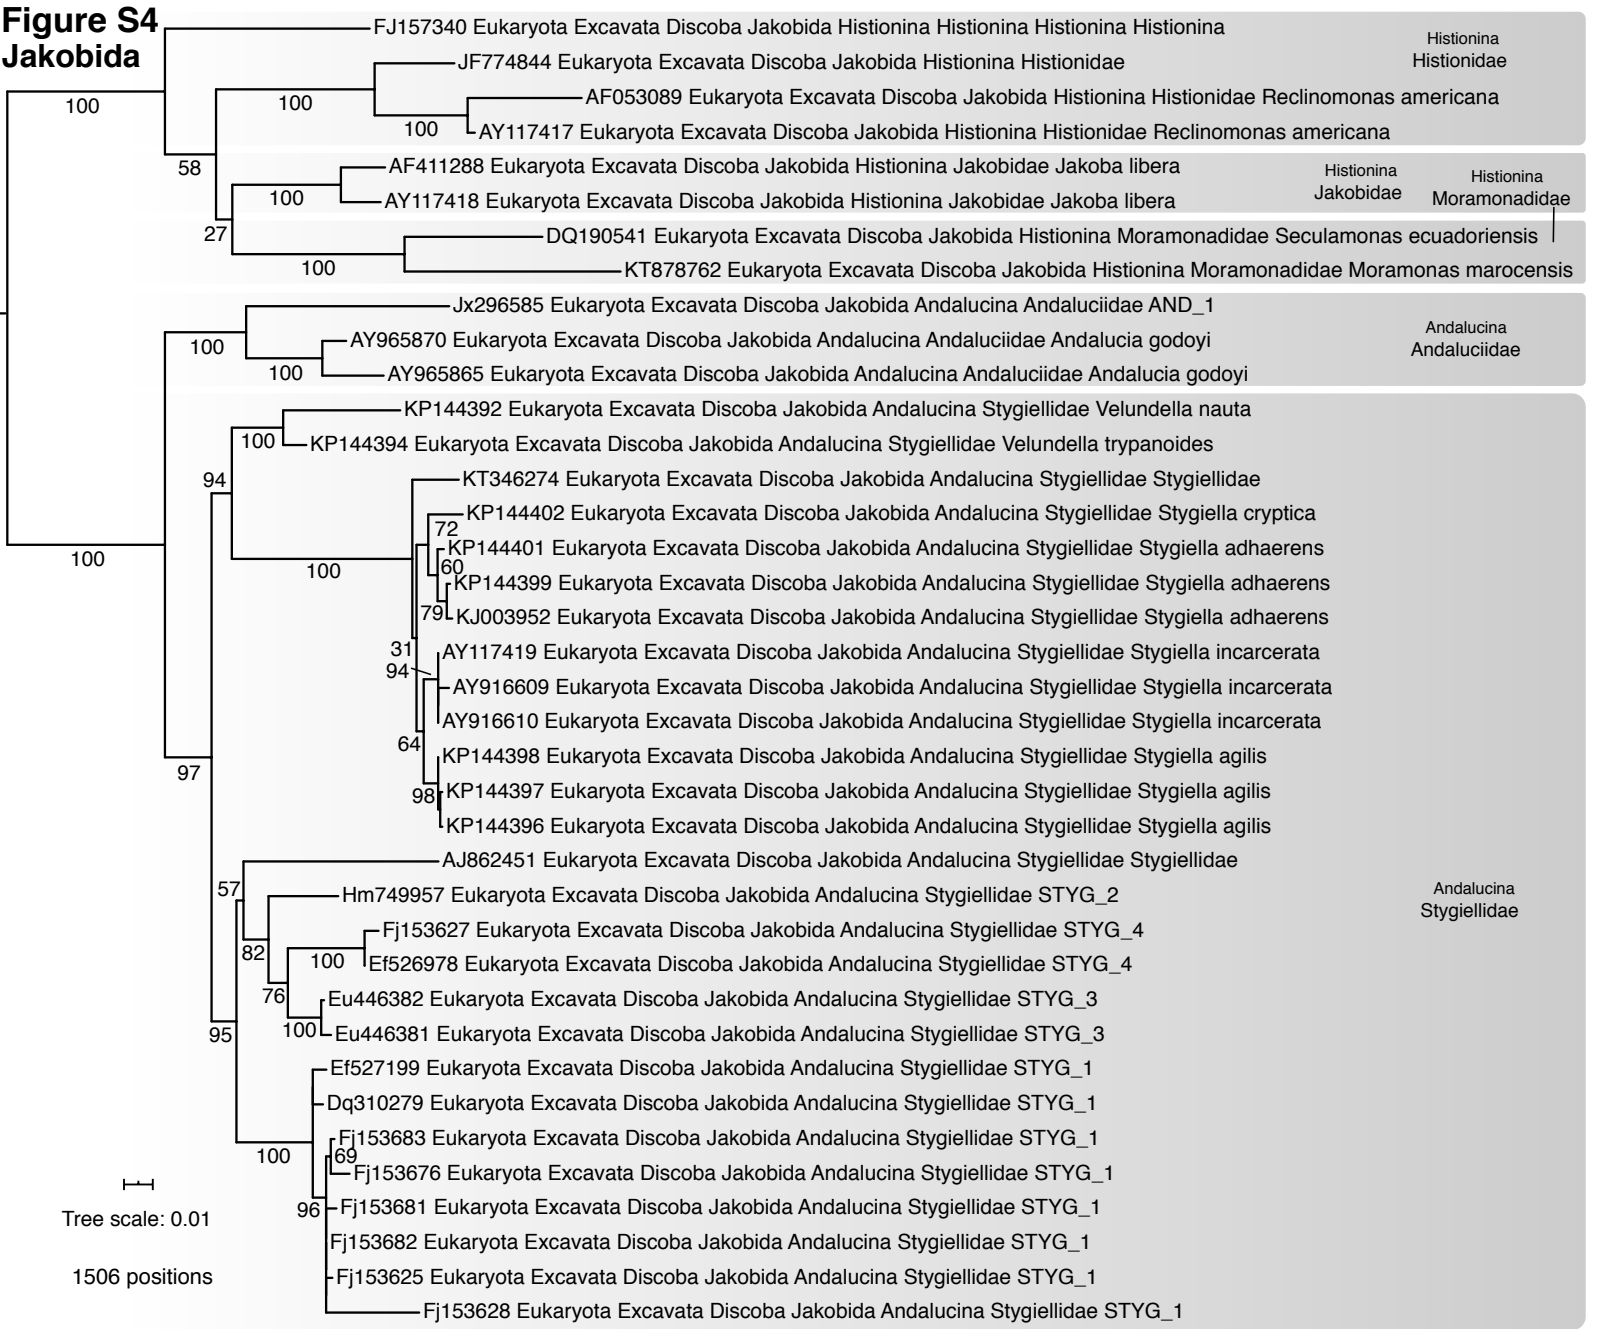



## Figure S5

### Heterolobosea

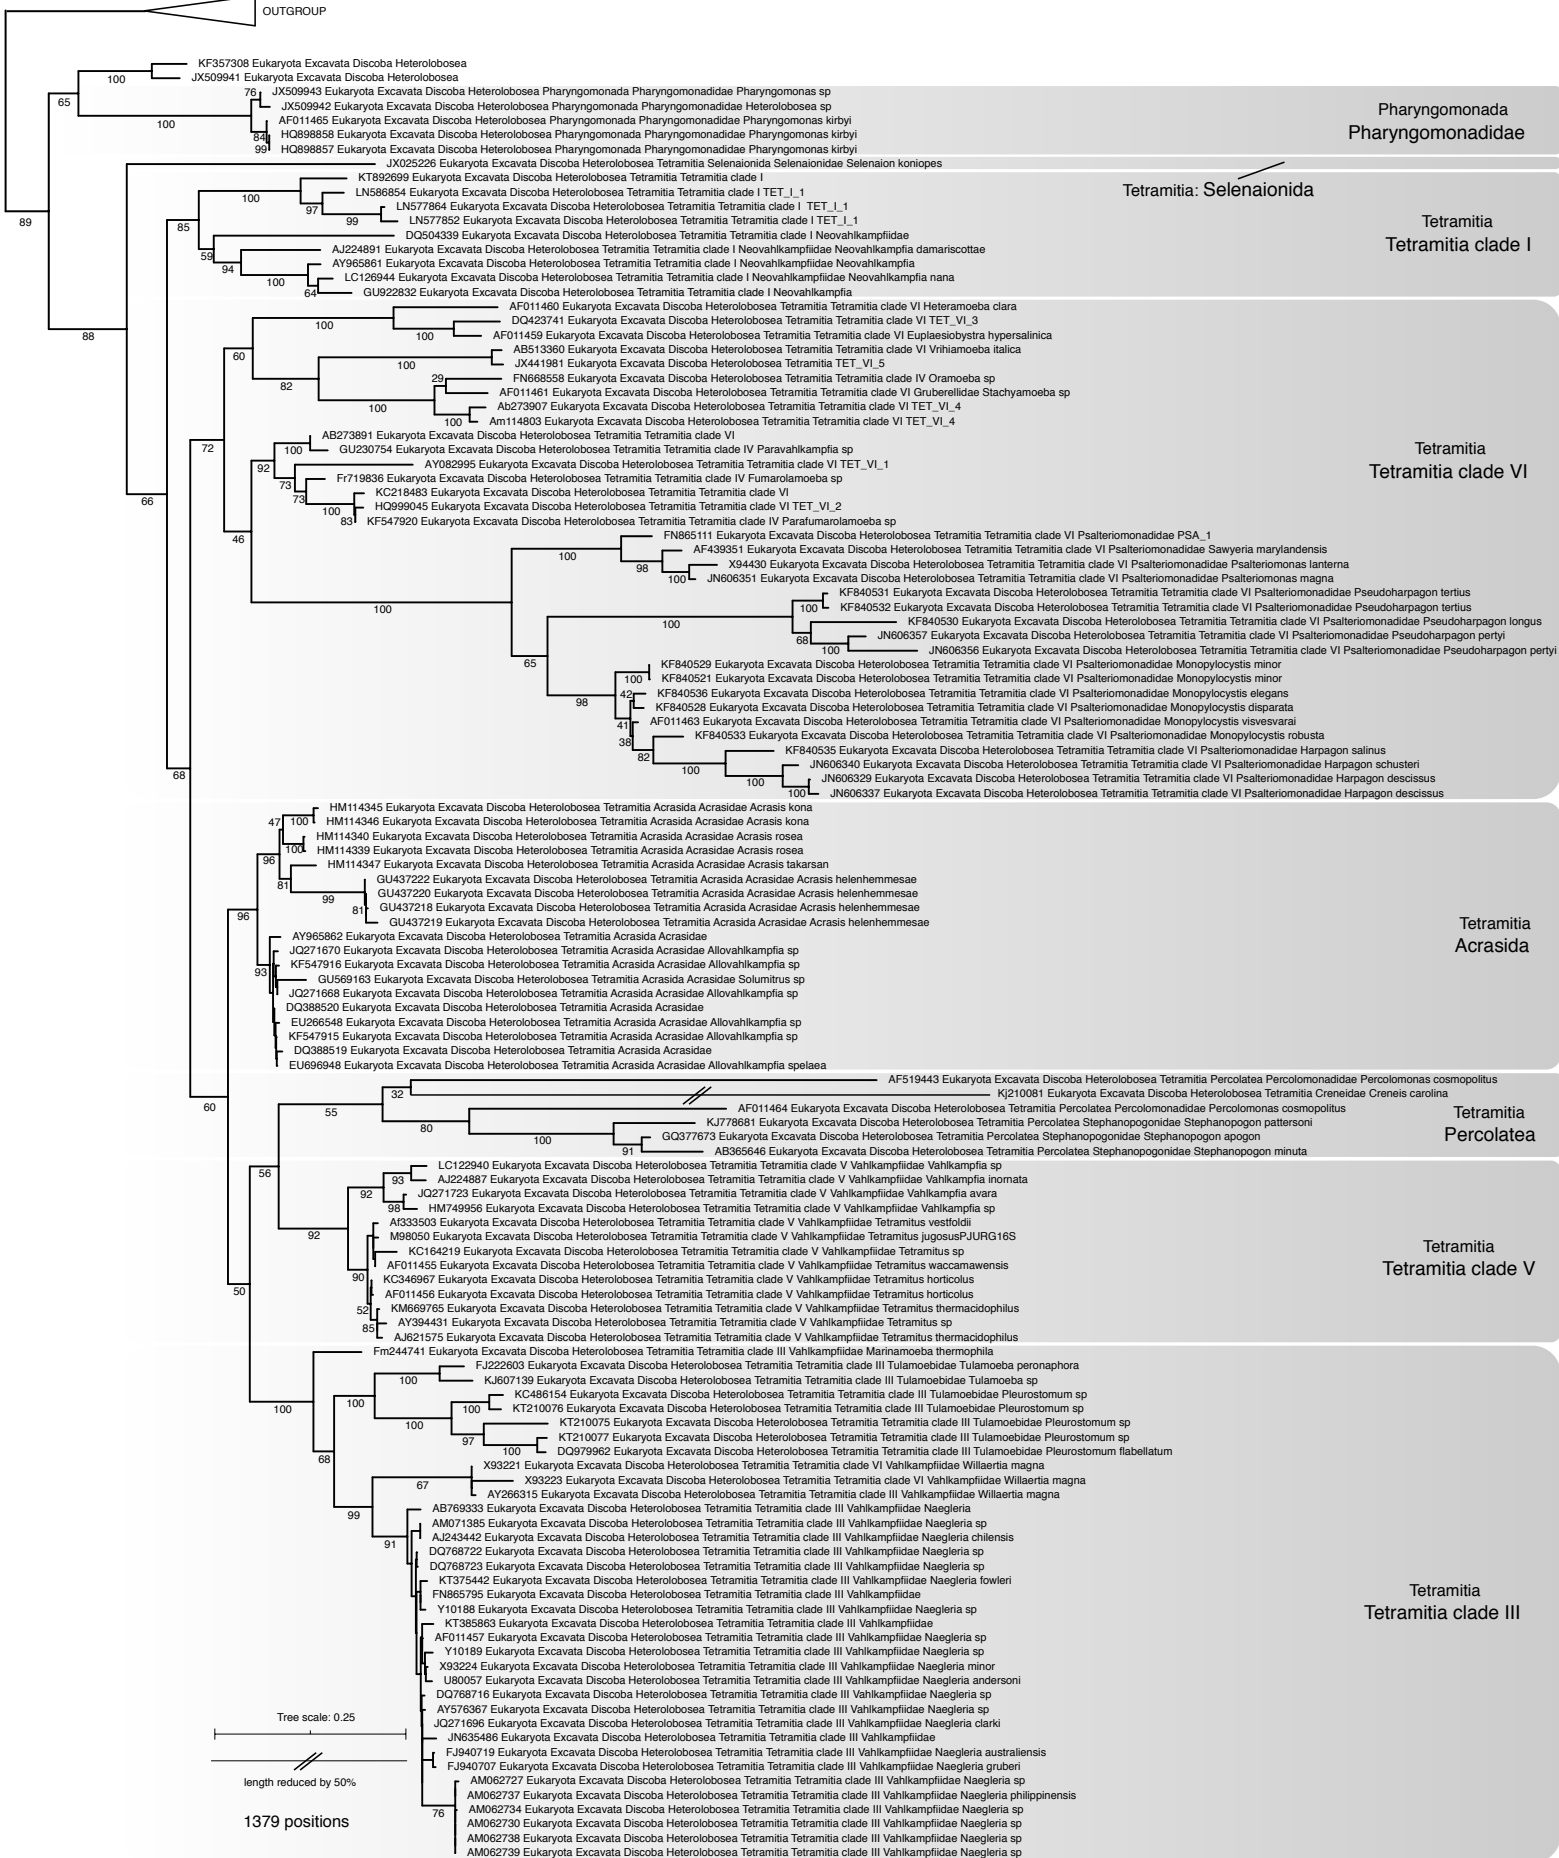

**Figure S6**  
**Euglenida 1**

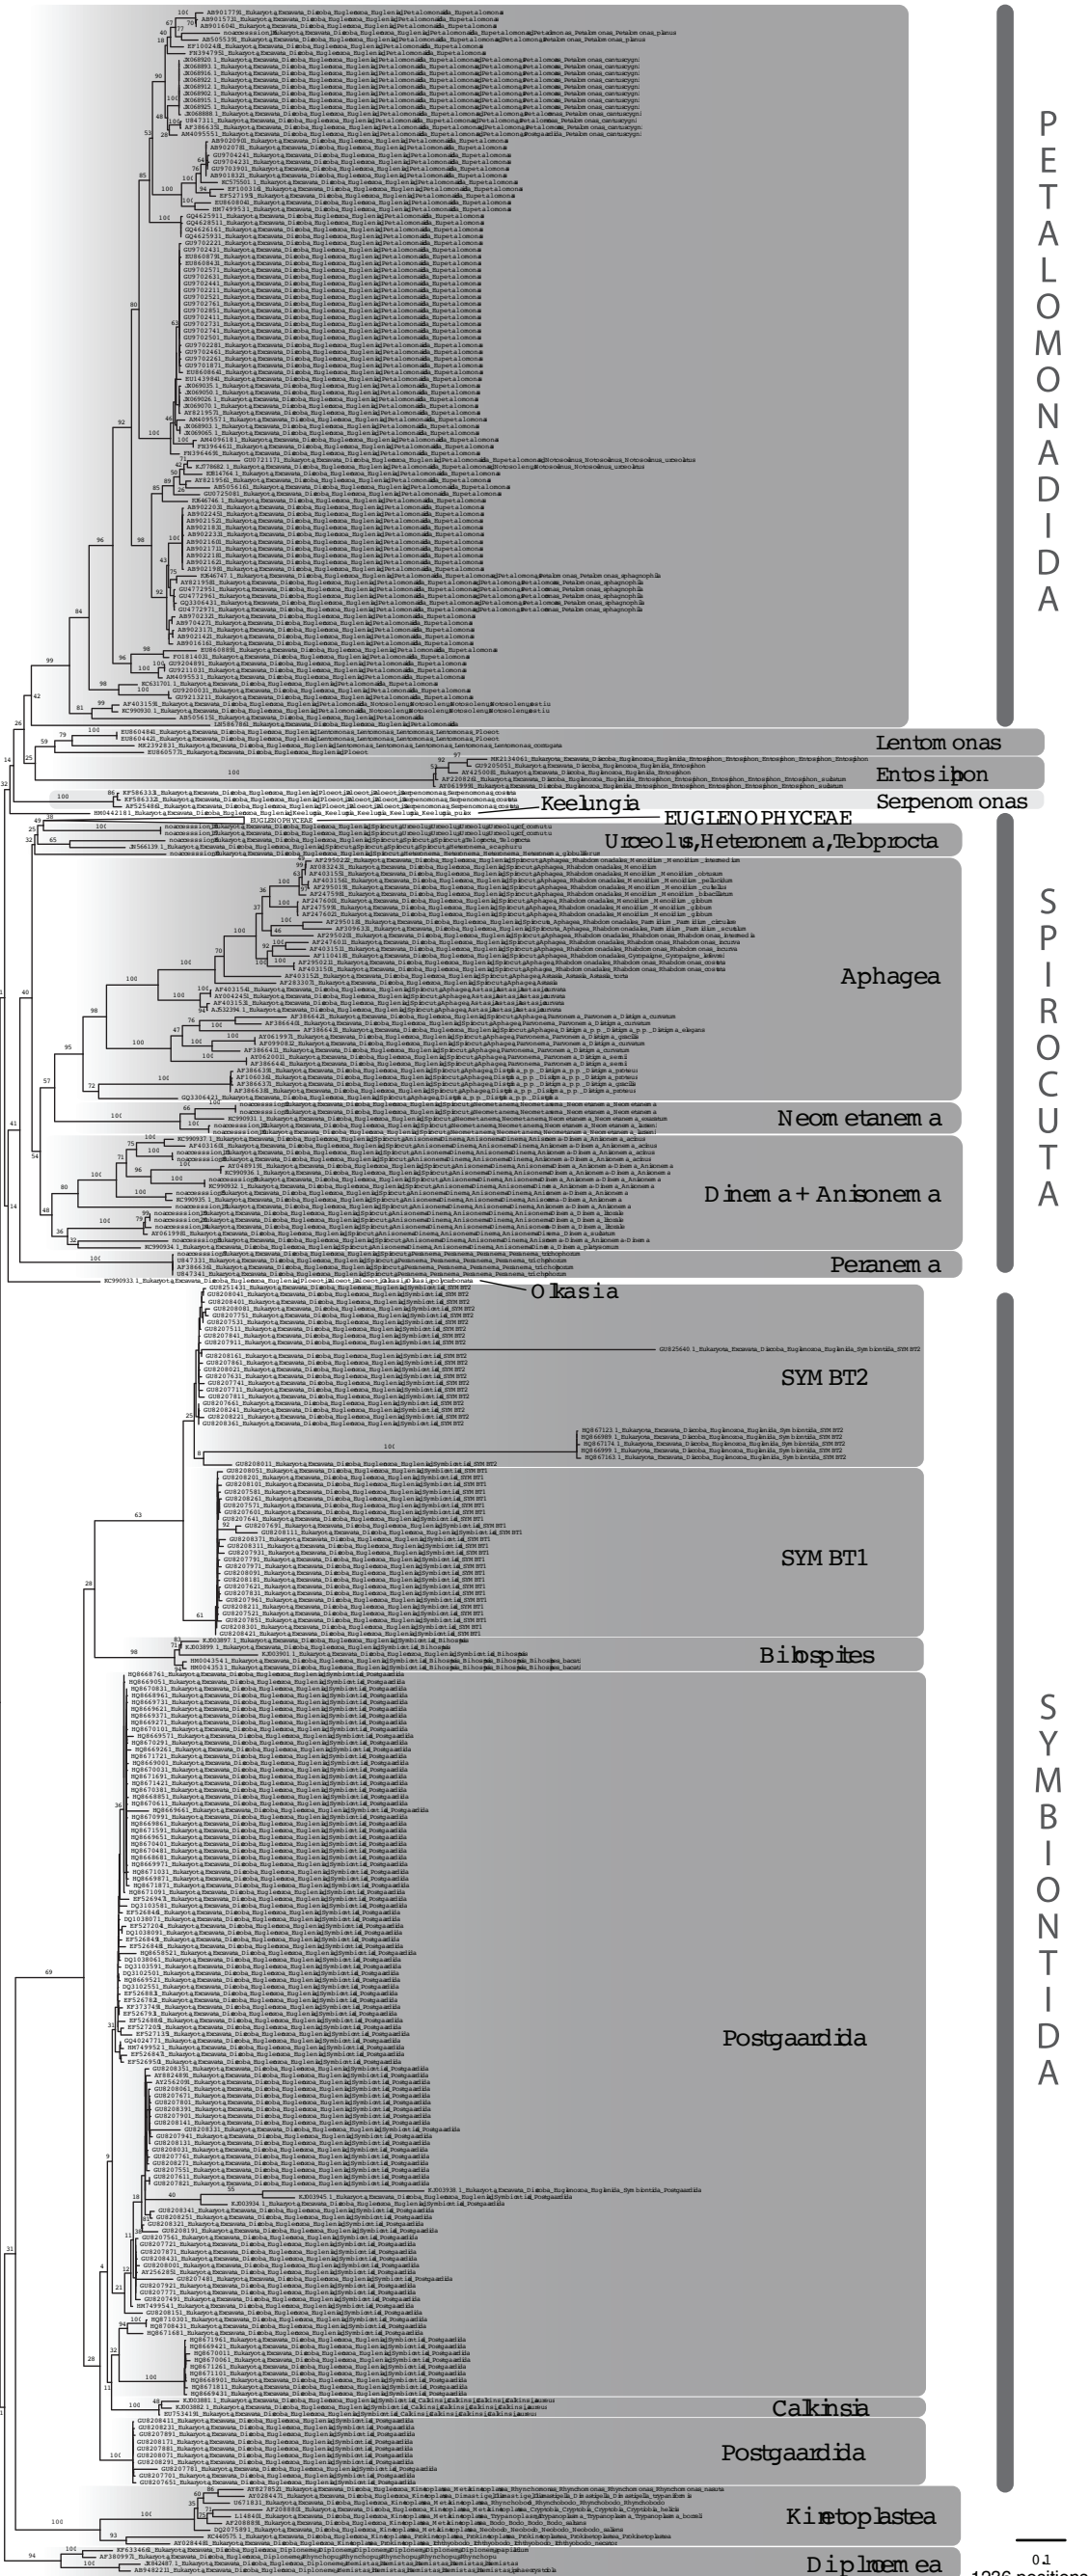

Figure S7  
Euglenida 2

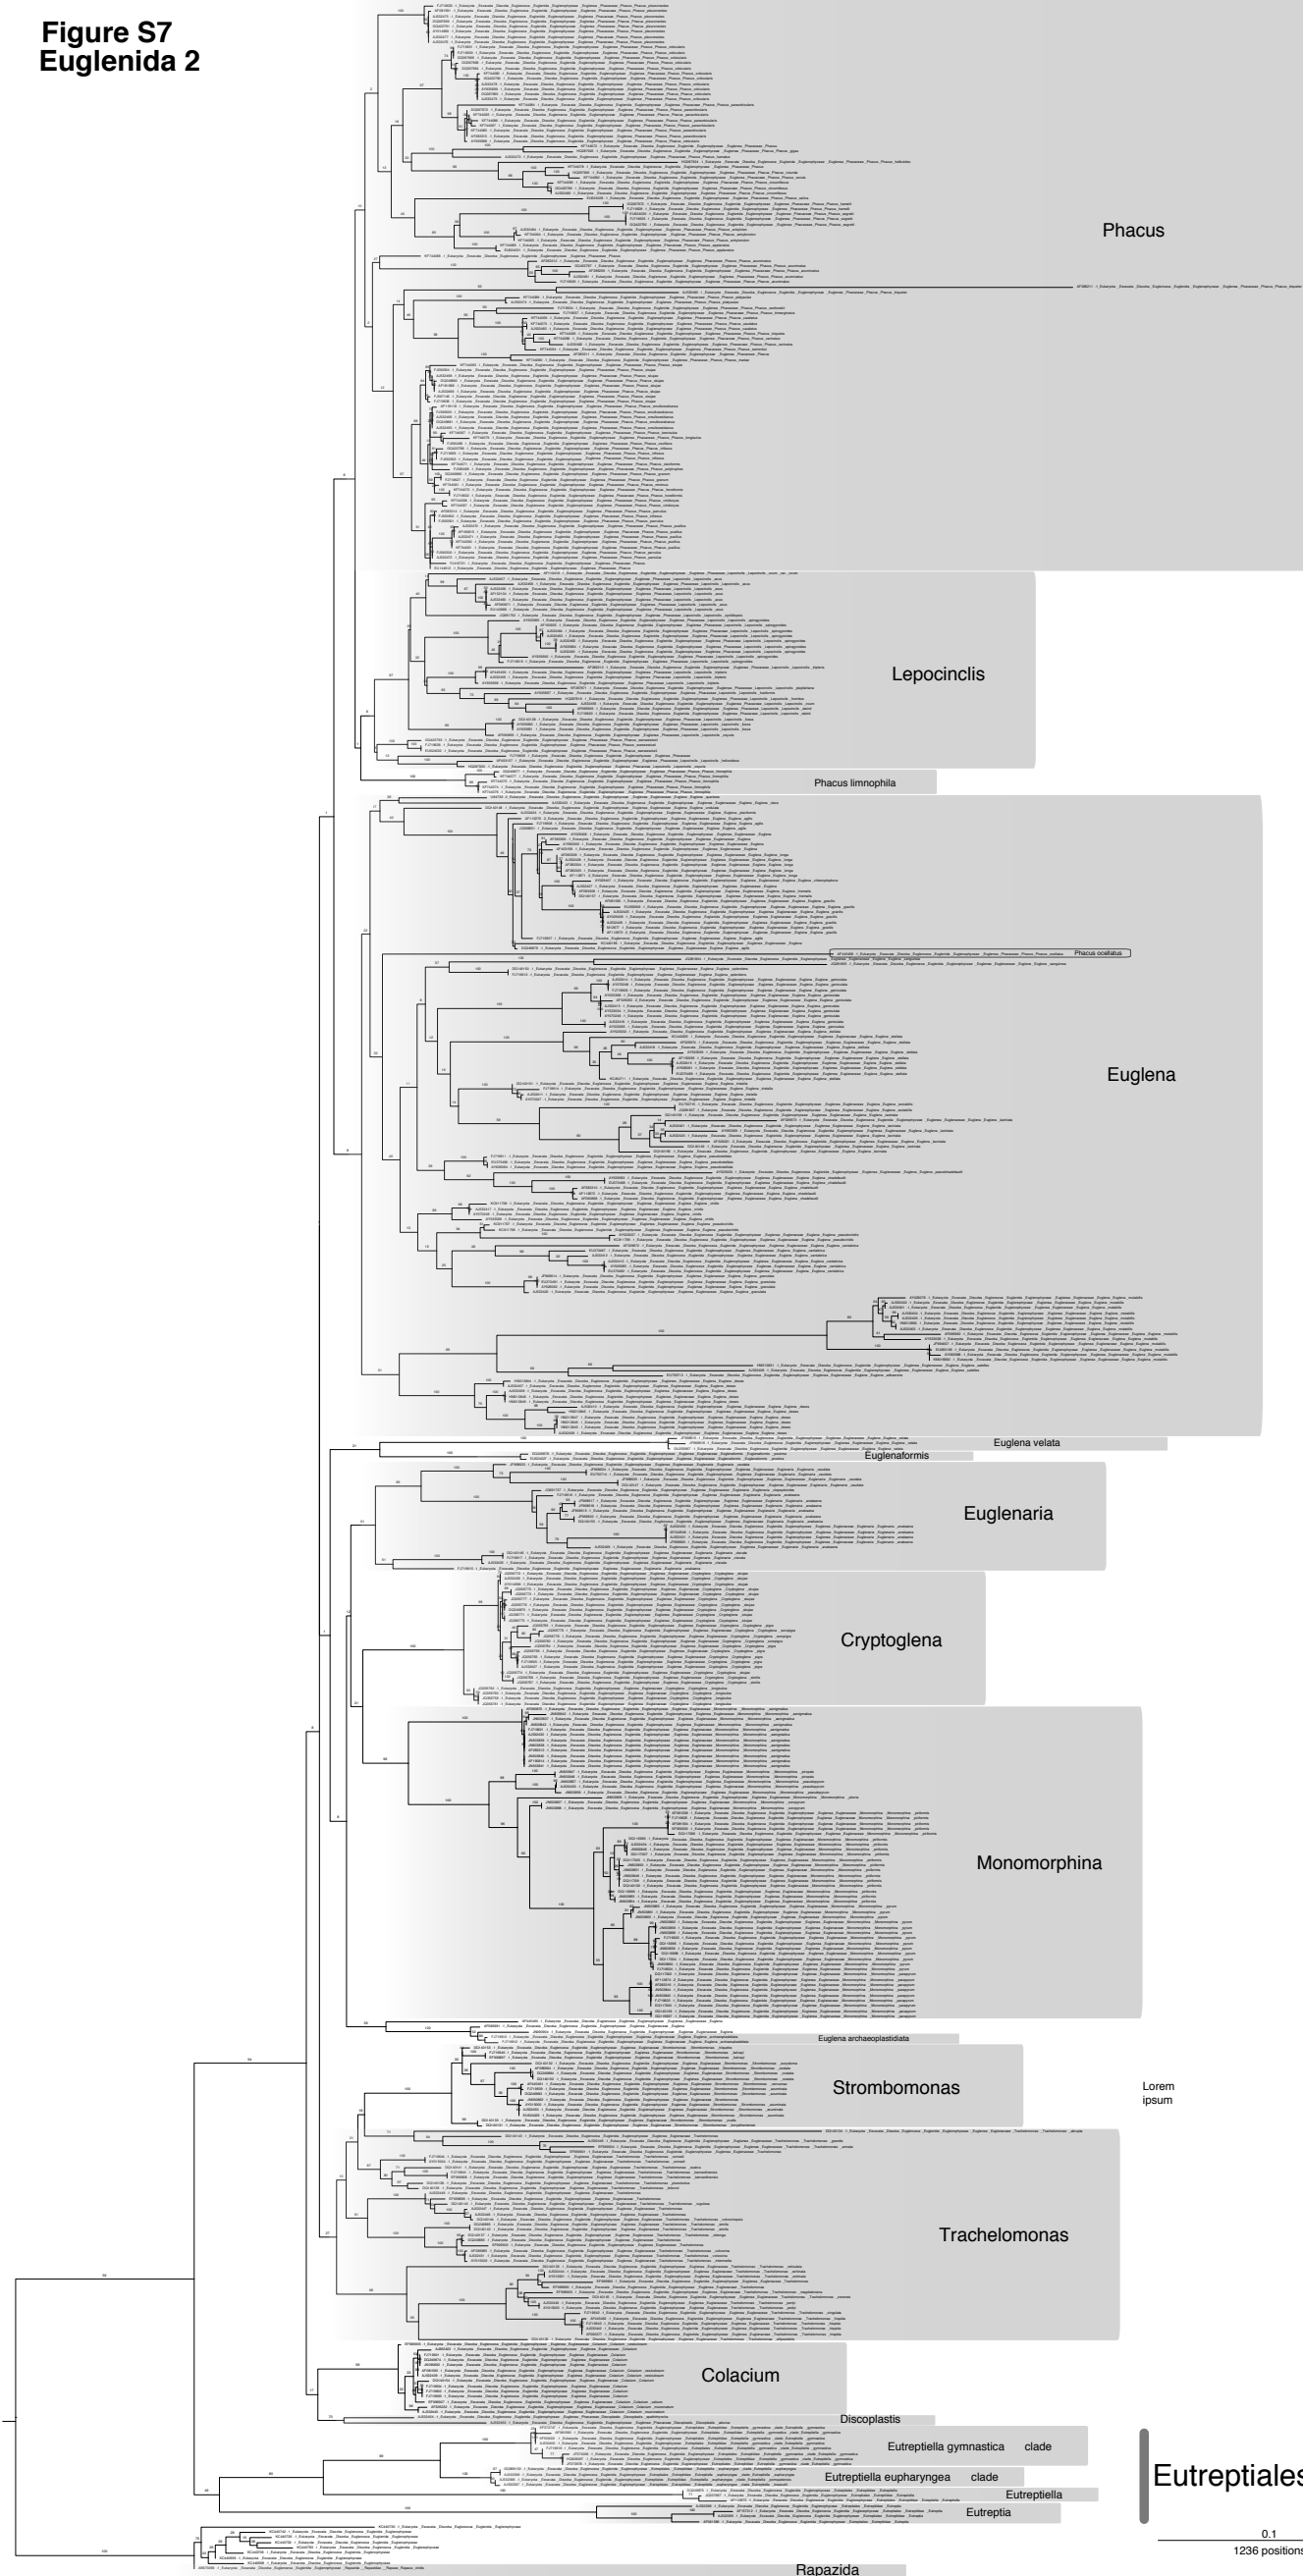

EUGLENA

Eutreptiales

0.1  
1236 positions



Figure S8  
Diplonemea

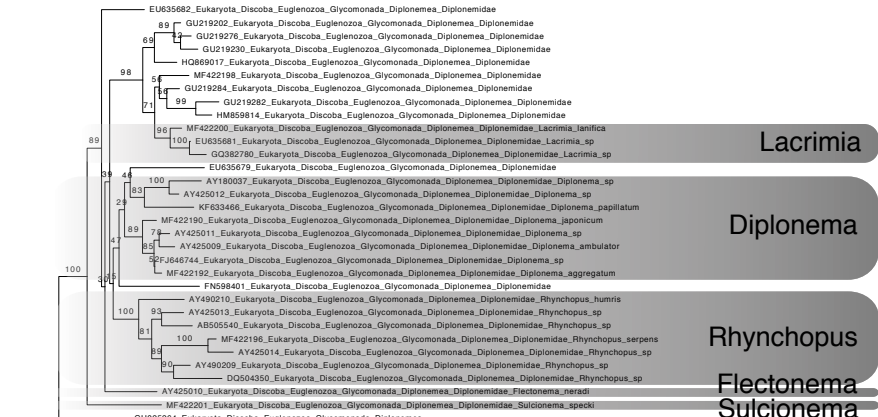

Diplonemidae

Rhynchopus

Flectonema

Sulcionema

Hemistasiidae

DSPDII

Eupelagonemidae

0.3

1637 positions

Figure S9  
Kinetoplastea

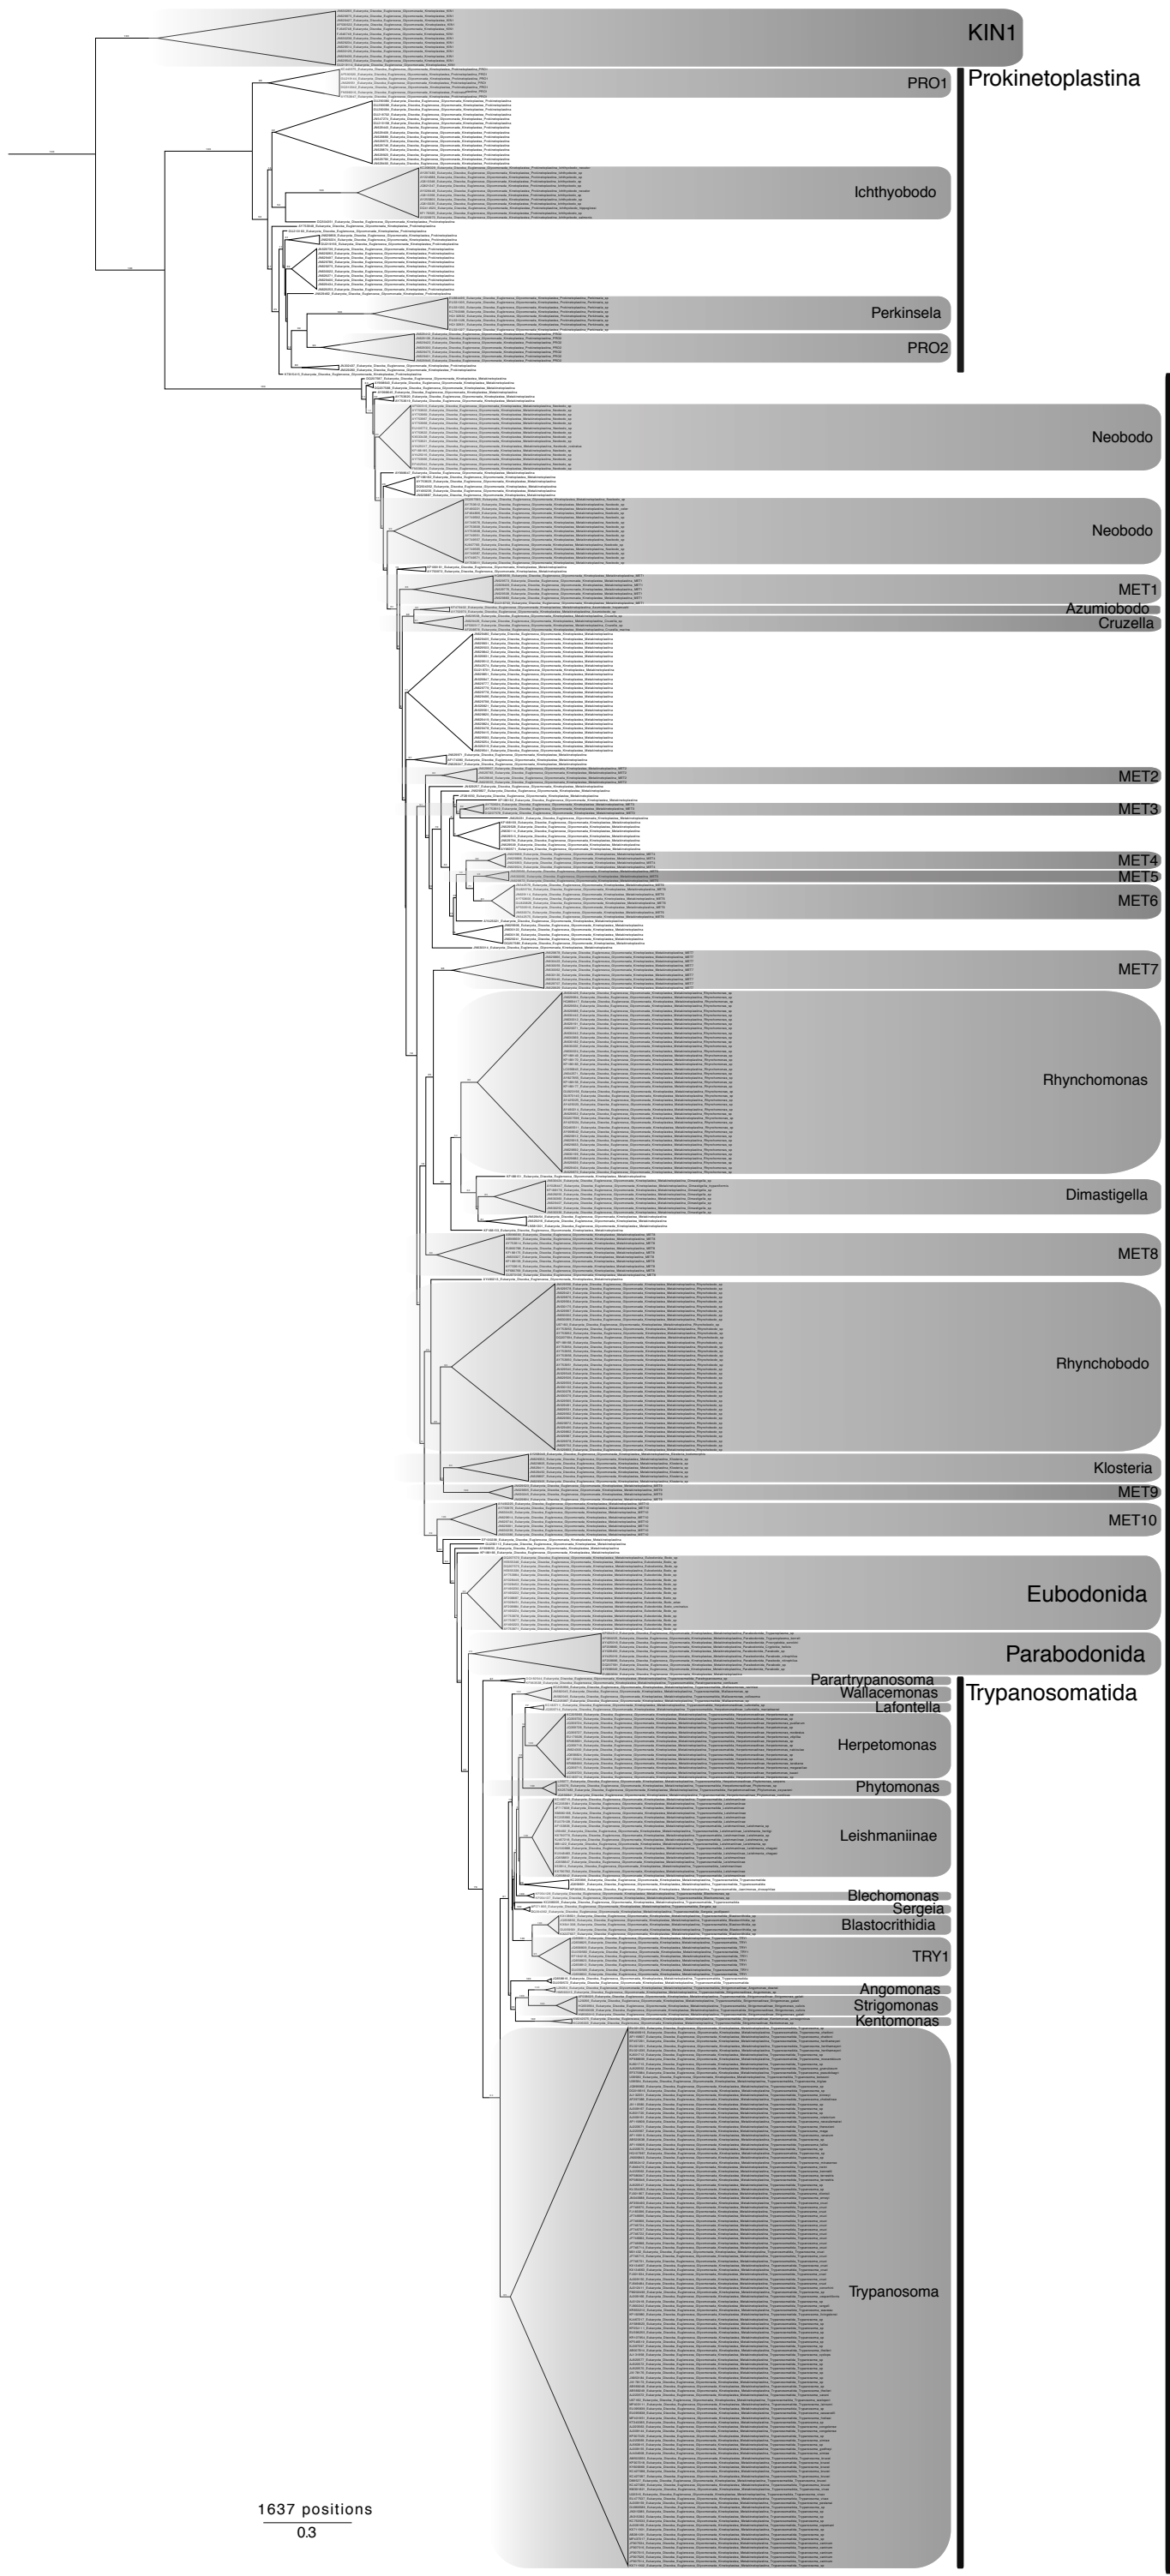

Metakinetoplastina

KIN1

PRO1

Ichthyobodo

Perkinsela

PRO2

Neobodo

Neobodo

MET1

Azumiobodo

Cruzella

MET2

MET3

MET4

MET5

MET6

MET7

Rhynchomonas

Dimastigella

MET8

Rhynchobodo

Klosteria

MET9

MET10

Eubodonida

Parabodonida

Paratrypanosoma

Wallacemonas

Lafontella

Herpetomonas

Phytomonas

Leishmaniinae

Blechomonas

Sergeia

Blastocrithidia

TRY1

Angomonas

Strigomonas

Kentomonas

Trypanosoma

Prokinetoplastina

Trypanosomatida
